# Supplementary material for: Towards improving sterile insect technique: Exposure to orange oil compounds increases sexual signalling and longevity in Ceratitis capitata males of the Vienna 8 GSS
Source: PLoS One. 2017 Nov 30;12(11):e0188092. doi: 10.1371/journal.pone.0188092 (PMC5708806; doi:10.1371/journal.pone.0188092)
Supplement: S1 File — Protocol format used filled in with original observations of male sexual signaling. (XLSX) [file pone.0188092.s009.xlsx]

## Sheet: keys
S=Sugar fed only
PS=Protein and sugar fed

## Sheet: Calling S 16 day
Experiment:
Age:	16 days old
Date:
strain:	TSL VIENNA 8
food:	S
Replicates							T I M E
	07:00:00	08:00:00	09:00:00	10:00:00	11:00:00	12:00:00	13:00:00	14:00:00	15:00:00	16:00:00	17:00:00	18:00:00	19:00:00	20:00:00	20:45:00
Limonene
1	3	4	6	6	5	6	5	0	0	0	0	0	0	0	0
2	2	4	1	0	2	5	1	0	0	0	0	0	0	0	0
3	7	8	6	8	7	7	4	1	0	0	0	0	0	1	2
4	6	8	7	9	6	3	4	0	0	0	0	0	0	1	2
5	6	8	7	8	7	7	4	1	0	0	0	0	0	2	4
6	10	10	9	7	10	10	4	2	3	2	4	5	6	4	5
7	10	10	8	8	10	10	4	2	2	1	1	2	3	6	5
8	8	8	9	7	9	8	4	0	0	0	0	0	6	7	6
9	6	9	8	10	5	4	4	3	2	2	4	4	4	7	6
10	9	8	10	10	7	7	3	1	0	1	1	1	3	5	5
Orange oil
1	8	7	8	7	7	4	4	2	0	0	0	0	0	3	4
2	7	9	8	9	6	4	4	3	0	1	0	0	0	0	1
3	6	9	10	8	5	5	7	1	0	0	0	0	1	5	7
4	3	4	6	6	5	4	3	0	0	0	0	0	0	1	1
5	4	6	6	8	6	8	7	0	0	0	0	0	0	1	2
6	9	7	5	8	8	8	2	4	0	2	4	4	3	4	5
7	7	8	10	6	8	8	2	0	0	3	2	2	3	5	6
8	7	9	9	7	6	6	4	2	3	0	0	0	4	4	6
9	9	10	8	7	9	9	7	2	2	0	0	0	6	6	5
10	9	7	9	9	6	7	2	0	2	1	3	3	5	4	5
Mixture
1	9	8	8	10	7	8	5	0	1	0	0	0	0	3	5
2	6	7	7	9	9	7	7	0	0	0	0	0	0	2	4
3	7	7	8	8	7	8	8	1	0	0	0	0	0	2	3
4	6	8	9	9	8	10	10	0	0	0	0	0	0	2	3
5	4	7	7	8	6	7	4	2	0	0	0	0	0	0	2
6	10	8	7	10	9	10	6	1	0	0	1	1	8	8	8
7	9	8	9	9	8	8	2	1	5	2	2	2	8	8	8
8	8	8	8	9	8	9	5	0	4	1	5	5	6	9	7
9	7	9	9	5	7	7	3	2	2	0	3	3	6	7	8
10	8	9	9	7	8	8	2	3	3	2	3	3	7	7	8
Control
1	7	7	8	8	6	4	3	1	0	0	0	0	0	5	6
2	7	9	8	8	6	3	5	2	0	0	0	0	1	1	1
3	5	8	7	8	8	8	6	1	1	0	0	0	0	0	1
4	7	7	6	9	5	3	5	1	0	0	0	0	0	3	4
5	4	6	7	2	6	4	5	3	1	0	0	0	0	0	1
6	8	9	8	4	4	5	3	2	6	4	3	4	2	6	7
7	10	9	8	10	4	5	2	2	1	1	4	5	3	5	6
8	7	7	7	7	3	3	4	0	0	0	0	0	3	3	3
9	8	8	8	7	4	5	1	2	1	0	2	3	1	5	6
10	8	10	8	9	7	7	3	1	1	1	2	2	4	8	8

## Sheet: Calling S 10 day
Experiment:
Age:	10 days old
Date:
strain:	TSL VIENNA 8
food:	S
Replicates							T I M E
	07:00:00	08:00:00	09:00:00	10:00:00	11:00:00	12:00:00	13:00:00	14:00:00	15:00:00	16:00:00	17:00:00	18:00:00	19:00:00	20:00:00	20:45:00
Limonene
1	6	8	7	7	10	8	8	3	1	0	0	0	2	5	8
2	9	9	9	7	7	7	8	4	1	0	0	2	4	5	6
3	9	9	8	8	9	10	7	4	0	1	0	4	5	7	8
4	8	10	10	7	8	9	5	3	0	0	0	3	4	6	8
5	10	10	9	9	9	9	5	3	2	2	0	0	7	7	8
6	9	10	10	6	7	7	7	6	2	0	0	0	0	7	8
7	10	10	9	9	9	9	6	5	1	0	1	0	5	6	9
8	8	9	10	8	8	9	6	7	0	0	0	1	1	5	7
9	9	10	8	9	9	8	7	1	0	0	0	0	2	4	9
10	8	9	8	8	8	10	9	5	2	0	0	0	1	5	7
Citrus oil	0.371184	0.221108	0.326599	0.326599	0.305505	0.339935	0.416333	0.546707	0.276887	0.213437	0.1	0.471405	0.706321	0.334996	0.290593
1	8	8	9	8	6	9	9	5	2	0	0	1	3	3	5
2	9	7	5	7	9	6	7	4	1	0	0	0	3	5	6
3	10	9	9	10	9	9	8	8	0	0	0	0	2	4	4
4	8	8	10	8	7	9	8	4	1	0	0	1	1	2	5
5	7	7	6	8	7	9	8	5	2	0	0	0	2	3	6
6	8	9	10	8	8	9	6	7	6	0	1	0	3	3	7
7	10	10	10	7	8	7	9	6	3	0	0	0	0	3	7
8	9	10	8	9	9	8	8	5	2	0	0	0	2	8	8
9	9	10	9	10	10	8	7	5	1	0	0	0	0	3	5
10	6	7	10	7	8	7	7	2	1	0	1	0	0	9	9
Mixture
1	9	10	8	10	9	8	4	5	1	0	0	0	1	7	9
2	10	8	9	7	8	9	8	4	0	0	0	1	1	6	8
3	10	9	9	8	7	9	5	3	0	0	0	1	2	5	5
4	9	8	8	9	8	9	6	2	0	0	0	3	3	7	10
5	10	10	9	9	8	8	5	3	2	0	0	0	3	6	8
6	10	9	8	9	9	6	8	5	4	0	0	0	1	6	4
7	10	9	9	7	7	6	8	4	4	1	0	0	3	6	9
8	10	9	9	9	9	6	7	6	1	1	0	0	2	5	9
9	10	10	10	6	6	8	9	6	4	0	0	0	2	5	8
10	9	9	8	10	10	8	8	7	2	0	0	0	4	6	9
Control
1	10	9	8	9	10	7	7	3	1	0	0	1	3	4	7
2	9	9	10	9	6	7	8	3	0	0	0	2	3	3	9
3	8	9	8	8	8	9	6	3	0	0	0	0	3	3	6
4	9	8	9	9	9	7	4	4	1	1	0	0	2	6	6
5	8	9	8	7	8	9	7	5	2	0	0	1	0	4	10
6	9	10	7	7	7	6	8	5	4	0	0	0	0	5	7
7	10	9	10	7	8	7	9	7	3	0	1	0	0	8	9
8	10	9	9	8	8	9	4	4	5	1	0	0	0	6	5
9	9	10	9	8	8	7	6	3	2	0	1	1	0	9	9
10	8	9	7	10	9	7	9	2	2	1	0	0	1	8	6

## Sheet: Calling S 9 day
Experiment:
Age:	9 days old
Date:
strain:	TSL VIENNA 8
food:	S
Replicates							T I M E
	07:00:00	08:00:00	09:00:00	10:00:00	11:00:00	12:00:00	13:00:00	14:00:00	15:00:00	16:00:00	17:00:00	18:00:00	19:00:00	20:00:00	20:45:00
Limonene
1	7	7	9	7	10	9	6	3	1	0	0	1	1	4	4
2	5	9	10	7	9	7	6	2	0	0	0	1	1	4	8
3	9	10	8	9	8	6	6	2	0	0	1	0	1	3	8
4	8	9	9	8	9	10	8	3	0	0	0	1	1	2	7
5	10	8	9	8	8	8	6	4	0	0	0	2	3	8	8
6	9	10	9	8	7	7	7	8	3	0	1	0	0	7	8
7	10	10	9	8	9	10	6	3	3	0	0	0	5	8	8
8	8	9	8	9	9	7	5	6	2	0	0	1	1	3	5
9	10	10	7	6	10	8	8	9	5	1	0	0	2	7	5
10	8	7	8	9	9	9	8	8	4	1	0	0	1	4	6
Orange oil
1	8	9	10	6	6	8	6	4	1	2	0	0	1	4	7
2	9	9	9	7	7	10	9	3	1	0	0	2	4	6	7
3	9	9	9	8	10	8	9	6	1	0	0	0	4	4	6
4	6	9	9	9	8	9	5	3	2	0	0	0	3	8	7
5	5	7	9	9	8	5	8	5	1	0	0	0	1	4	6
6	10	10	10	9	7	8	9	5	1	1	0	0	3	5	6
7	10	10	9	9	10	9	8	9	1	0	0	0	0	6	8
8	8	9	10	9	7	6	5	7	2	0	0	0	2	3	5
9	9	10	9	9	6	9	7	6	1	0	0	0	0	6	9
10	8	8	9	8	10	10	8	2	2	1	0	0	0	5	6
Mixture
1	6	9	8	7	8	9	7	4	4	1	0	0	1	6	9
2	10	7	9	10	8	8	9	4	1	0	1	2	4	5	8
3	10	9	10	9	8	8	5	3	0	0	0	0	2	7	7
4	7	8	8	8	8	6	6	4	0	0	0	2	5	5	8
5	5	7	8	8	7	7	7	4	0	1	1	0	3	8	8
6	6	7	8	10	9	10	9	8	5	0	0	0	1	5	6
7	10	10	9	10	7	7	6	7	1	1	0	0	3	6	9
8	5	10	9	10	9	7	6	8	1	0	1	0	2	6	9
9	9	10	10	9	8	9	9	7	1	1	0	0	2	6	7
10	10	9	8	9	9	8	7	6	0	0	1	1	4	10	10
Control
1	8	8	9	8	8	10	7	4	0	0	0	0	2	6	6
2	7	10	8	6	9	9	7	4	1	0	0	0	1	4	8
3	8	7	7	5	9	9	8	6	0	0	0	1	2	6	9
4	9	9	6	9	8	9	7	1	0	0	0	1	2	7	9
5	9	8	9	9	9	7	7	4	0	0	0	0	1	3	7
6	8	8	9	8	7	7	5	6	4	0	0	0	0	4	7
7	10	9	9	9	10	7	9	7	3	3	0	0	0	2	9
8	8	9	8	9	7	8	4	6	4	1	0	0	0	0	5
9	6	9	10	7	8	6	8	6	4	0	0	0	0	5	7
10	8	7	7	9	9	7	9	8	5	0	0	0	1	2	6
																													s

## Sheet: Calling S 8 day
Age:	8 days old
Date:
strain:	TSL VIENNA 8
food:	S
Replicates							T I M E
	07:00:00	08:00:00	09:00:00	10:00:00	11:00:00	12:00:00	13:00:00	14:00:00	15:00:00	16:00:00	17:00:00	18:00:00	19:00:00	20:00:00	20:45:00
Limonene
1	10	10	7	10	8	7	6	1	0	0	0	0	1	1	4
2	7	9	8	9	8	8	4	3	0	0	0	1	1	5	6
3	9	8	8	8	8	9	7	3	0	0	0	0	4	7	7
4	10	8	8	7	9	9	6	1	0	0	0	1	2	4	7
5	8	10	9	10	9	8	6	5	0	0	0	0	1	4	8
6	8	8	8	9	9	8	6	3	0	0	0	1	4	5	7
7	9	8	8	10	9	9	6	3	0	0	0	0	1	7	7
8	10	9	8	8	8	9	4	1	0	0	0	1	1	4	8
9	10	10	7	7	8	9	7	1	0	0	0	0	2	4	4
10	7	10	9	10	8	7	6	5	0	0	0	0	1	1	6
Orange oil
1	8	7	8	9	7	8	8	5	0	0	1	1	2	7	6
2	9	9	7	5	8	7	7	4	0	0	0	0	3	3	5
3	6	9	9	9	9	9	9	3	0	1	0	2	3	5	7
4	9	9	9	8	9	7	7	4	4	1	0	0	3	7	5
5	8	8	8	7	8	6	8	4	1	0	0	0	2	5	8
6	8	7	8	10	10	8	8	6	0	1	0	1	3	7	5
7	6	7	7	6	8	7	9	5	1	1	0	1	3	7	8
8	9	7	9	9	8	9	7	3	1	0	0	1	3	5	6
9	8	10	9	8	8	7	7	4	0	0	0	0	2	3	7
10	8	7	8	7	9	6	7	4	3	0	1	0	2	5	5
Mixture
1	8	8	10	5	5	10	7	3	1	0	0	0	3	5	10
2	9	9	10	7	5	6	7	1	1	0	0	1	5	5	8
3	9	10	10	10	8	8	8	4	0	0	1	0	3	7	6
4	9	9	9	10	9	8	5	1	1	0	1	0	4	7	9
5	7	9	6	9	7	7	6	1	0	0	0	0	3	4	8
6	9	9	10	10	7	8	6	1	0	0	1	0	3	7	8
7	9	9	6	10	10	8	8	1	1	0	1	0	4	7	9
8	9	10	9	7	8	6	7	4	0	0	0	0	3	5	6
9	8	8	10	5	5	7	5	3	1	0	0	1	5	4	8
10	7	9	10	9	4	10	7	1	1	0	0	0	3	5	10
Control
1	7	9	10	8	7	8	7	5	0	0	0	0	2	5	5
2	10	8	7	8	10	6	4	1	1	1	0	0	2	6	10
3	5	8	9	7	6	6	6	4	1	0	0	0	3	5	9
4	9	8	9	10	7	8	7	4	1	0	0	0	4	4	7
5	8	9	7	9	5	5	5	6	1	0	1	0	1	6	10
6	7	8	9	9	6	8	4	4	1	1	0	0	1	5	5
7	10	8	9	10	7	8	6	4	0	0	0	0	3	6	10
8	5	8	7	7	10	8	7	5	1	0	1	0	3	6	10
9	9	9	7	8	6	6	5	1	1	0	0	0	1	5	9
10	8	9	10	8	5	5	4	6	1	0	0	0	4	4	7

## Sheet: Calling S 7 day
Experiment:
Age:	7 days old
Date:
strain:	TSL VIENNA 8
food:	S
Replicates							T I M E
	07:00:00	08:00:00	09:00:00	10:00:00	11:00:00	12:00:00	13:00:00	14:00:00	15:00:00	16:00:00	17:00:00	18:00:00	19:00:00	20:00:00	20:45:00
Limonene
1	9	7	9	8	8	9	7	4	4	0	1	3	5	7	8
2	9	8	9	8	8	9	6	2	1	1	1	2	4	8	8
3	9	9	10	9	8	10	4	3	3	0	1	3	5	8	8
4	9	10	9	9	8	9	7	3	0	0	0	2	2	8	8
5	9	8	7	9	8	7	9	2	1	0	2	3	6	7	7
6	7	7	8	8	7	6	6	8	0	0	0	0	1	3	6
7	10	10	8	8	8	8	6	1	2	0	0	0	0	4	8
8	8	9	10	9	9	9	9	3	1	0	0	0	1	7	5
9	10	10	9	5	9	8	8	7	1	0	0	0	0	3	5
10	9	8	8	9	6	8	8	6	5	0	0	0	0	1	6
Orange oil
1	9	10	8	9	8	6	7	2	0	0	0	1	4	9	9
2	6	10	8	9	9	8	7	1	1	0	0	0	4	6	6
3	9	10	8	9	9	8	8	6	2	0	0	0	4	5	5
4	9	10	7	9	9	8	7	7	0	0	0	1	7	6	6
5	9	9	8	9	7	9	7	4	1	0	0	1	6	7	7
6	8	10	7	8	9	9	7	4	5	1	0	0	3	5	6
7	9	9	8	8	7	9	9	7	7	0	0	0	1	6	8
8	7	9	10	8	9	9	7	3	6	0	0	0	1	4	5
9	9	9	9	8	8	8	6	4	3	0	0	0	4	8	9
10	10	8	9	8	10	8	7	7	4	0	0	0	2	7	6
Mixture
1	7	9	10	9	9	8	9	5	3	0	0	1	4	8	9
2	9	10	8	8	10	6	10	2	1	0	0	4	7	8	10
3	7	9	7	9	10	6	7	3	2	0	0	1	4	7	9
4	8	10	9	8	8	9	8	2	1	0	2	0	7	9	9
5	9	8	9	9	9	9	9	6	3	0	0	0	4	8	8
6	7	7	6	8	8	7	9	8	2	0	0	0	1	3	6
7	10	9	7	8	6	8	8	8	2	0	0	0	2	7	9
8	9	10	8	7	7	9	10	9	3	0	0	0	5	7	9
9	10	8	10	9	7	6	8	8	4	0	0	1	3	9	7
10	10	9	8	8	7	9	10	9	3	0	0	0	6	9	10
Control
1	7	9	9	10	8	10	10	4	0	0	0	0	5	6	8
2	9	9	9	9	9	7	6	1	0	0	1	0	5	6	7
3	9	9	8	9	8	8	6	1	0	0	0	1	4	9	8
4	8	10	10	8	7	6	6	5	1	0	1	1	2	8	7
5	8	10	7	9	9	9	9	3	0	0	0	0	2	5	6
6	10	9	7	8	9	6	6	5	0	0	0	0	3	5	7
7	10	9	9	7	9	9	6	3	0	0	0	0	3	8	9
8	7	9	8	8	7	8	5	2	0	0	0	0	1	6	5
9	9	8	9	7	9	5	9	3	0	0	0	0	5	9	9
10	8	9	9	8	9	5	4	3	0	0	0	0	2	8	6

## Sheet: Calling S 6 day
Experiment:
Age:	6 days old
Date:
strain:	TSL VIENNA 8
food:	S
Replicates							T I M E
	07:00:00	08:00:00	09:00:00	10:00:00	11:00:00	12:00:00	13:00:00	14:00:00	15:00:00	16:00:00	17:00:00	18:00:00	19:00:00	20:00:00	20:45:00
Limonene
1	6	6	7	8	7	7	5	4	2	0	0	1	7	7	7
2	6	9	10	10	9	9	10	7	1	0	0	1	5	8	8
3	9	10	9	9	9	10	7	2	0	3	0	3	6	8	7
4	8	10	10	9	10	6	7	4	1	1	0	1	3	8	8
5	9	10	9	10	10	7	7	2	1	0	0	2	7	8	8
6	8	7	8	7	6	7	9	7	3	1	0	1	2	7	8
7	10	10	10	6	5	9	7	8	1	0	0	0	1	6	9
8	10	8	8	7	8	9	8	7	1	0	0	0	0	5	7
9	10	9	7	8	6	8	8	9	0	0	0	0	0	4	9
10	6	8	7	7	7	5	8	3	1	0	0	0	0	5	7
Orange oil
1	7	8	8	9	9	8	7	5	2	0	0	0	4	9	9
2	7	9	7	9	10	9	6	5	3	0	0	1	6	6	5
3	8	7	9	7	8	8	7	6	2	1	0	0	6	5	6
4	9	7	9	9	10	10	8	6	1	0	0	1	5	6	9
5	9	9	8	8	7	8	7	7	4	0	0	1	3	6	8
6	8	8	10	6	9	8	4	6	0	0	0	0	0	3	7
7	10	10	7	9	7	9	7	2	3	0	0	0	0	3	7
8	9	9	7	6	9	8	8	6	1	0	0	0	2	8	8
9	10	8	8	8	8	10	9	5	0	0	0	0	1	3	9
10	8	10	9	8	8	10	10	8	3	1	0	1	2	9	9
Mixture
1	10	9	6	7	8	9	10	5	0	0	0	1	6	8	9
2	9	10	9	7	8	8	8	1	1	2	0	2	5	8	10
3	8	7	8	6	7	7	9	2	3	2	0	1	2	7	9
4	10	9	8	8	8	9	9	4	5	3	1	5	6	9	9
5	7	7	10	7	9	9	6	3	3	0	0	1	3	8	9
6	8	9	8	10	8	7	4	1	0	0	0	0	0	6	4
7	9	9	8	7	8	8	8	0	2	1	0	0	3	8	9
8	9	9	8	9	7	8	9	6	0	0	0	0	0	8	8
9	10	8	9	10	9	8	5	2	2	0	0	0	2	5	9
10	9	9	10	8	8	6	6	7	2	0	0	8	1	10	8
Control
1	8	7	6	7	9	7	6	1	0	0	0	1	4	6	8
2	8	7	6	8	8	8	8	3	0	0	0	1	5	6	7
3	7	10	9	9	8	8	7	3	0	0	0	1	5	9	8
4	10	9	9	8	8	8	5	4	0	0	0	0	6	8	7
5	8	6	5	8	7	7	8	4	1	0	0	0	2	5	6
6	7	9	8	5	10	6	4	4	3	0	0	0	0	5	7
7	8	7	6	7	7	6	5	9	1	0	0	0	0	6	9
8	7	8	5	8	8	4	8	7	2	0	0	0	0	2	5
9	8	8	8	10	8	7	8	6	2	1	0	0	0	5	9
10	7	10	6	8	6	5	7	4	0	0	0	0	0	0	6

## Sheet: Calling PS 16 day
Experiment:
Age:	16 days old
Date:
strain:	TSL VIENNA 8
food:	PS
Replicates							T I M E
	07:00:00	08:00:00	09:00:00	10:00:00	11:00:00	12:00:00	13:00:00	14:00:00	15:00:00	16:00:00	17:00:00	18:00:00	19:00:00	20:00:00	20:45:00
Limonene
1	9	8	7	6	9	5	6	6	1	0	0	0	1	3	4
2	7	9	8	8	8	8	6	3	0	0	0	0	0	3	4
3	9	10	8	9	10	8	7	6	1	0	0	0	0	3	5
4	6	9	9	10	9	9	5	3	1	0	0	0	0	3	4
5	7	9	10	9	10	10	5	3	0	0	0	0	0	5	7
6	8	10	7	7	8	8	7	6	7	8	7	7	10	8	8
7	10	7	9	10	6	6	6	4	4	1	6	6	9	8	8
8	10	7	9	9	7	7	7	3	5	6	9	8	9	10	10
9	8	9	8	9	7	8	9	4	1	2	5	4	9	9	8
10	10	10	8	6	9	9	3	8	4	2	6	6	9	10	9
Orange oil
1	9	9	10	8	7	7	9	5	1	0	0	0	0	5	6
2	10	9	10	8	9	6	5	4	0	0	0	0	0	6	7
3	9	10	9	10	9	8	6	2	1	0	0	0	3	6	8
4	9	6	9	10	7	7	5	3	0	0	0	0	2	5	7
5	8	9	10	10	9	6	6	3	1	0	0	0	2	4	6
6	8	9	8	5	7	7	5	5	6	5	8	7	9	7	8
7	10	9	9	10	7	7	4	5	4	4	4	4	9	9	9
8	7	7	10	8	6	6	6	5	6	3	8	8	8	6	7
9	10	8	9	7	8	8	6	3	5	3	5	5	7	6	7
10	8	7	7	6	6	6	5	2	2	0	5	4	9	7	8
Mixture
1	10	9	10	9	9	10	7	6	1	0	0	0	0	2	4
2	8	10	8	9	9	9	9	3	2	0	1	0	1	7	8
3	7	7	8	8	8	8	5	6	3	0	0	0	0	1	2
4	8	8	10	8	9	8	5	5	1	0	0	0	1	3	5
5	8	8	7	10	8	9	9	6	2	0	0	0	2	4	5
6	7	10	9	9	4	5	2	7	4	2	7	6	8	8	8
7	10	7	7	9	6	7	7	6	2	1	3	3	7	8	8
8	8	7	8	7	4	5	6	3	3	3	3	3	6	6	7
9	9	9	7	9	10	10	7	6	5	4	9	9	10	9	7
10	7	4	6	6	8	8	5	3	3	4	7	6	7	7	7
Control
1	6	8	7	10	7	6	5	1	0	0	0	0	2	3	4
2	10	9	8	10	8	6	6	1	0	0	0	0	1	4	5
3	10	10	10	10	9	7	5	1	0	0	0	0	1	7	7
4	9	9	10	10	9	8	8	4	1	0	0	0	0	6	6
5	8	6	6	9	7	5	7	4	0	0	0	0	1	7	7
6	9	9	6	8	9	9	5	2	1	0	3	3	8	9	8
7	5	6	7	7	7	7	6	3	1	0	5	5	6	7	8
8	8	9	8	9	7	8	8	3	2	0	0	0	8	8	7
9	9	8	8	9	6	7	6	5	1	0	5	5	8	8	7
10	10	8	7	10	9	9	5	3	6	4	7	6	9	8	8

## Sheet: Calling PS 10 day
Experiment:
Age:	10 days old
Date:
strain:	TSL VIENNA 8
food:	PS
Replicates							T I M E
	07:00:00	08:00:00	09:00:00	10:00:00	11:00:00	12:00:00	13:00:00	14:00:00	15:00:00	16:00:00	17:00:00	18:00:00	19:00:00	20:00:00	20:45:00
Limonene
1	8	10	10	9	9	6	9	6	3	3	0	1	2	8	7
2	9	10	9	8	9	5	8	3	3	2	0	1	2	5	9
3	10	10	10	10	8	9	9	7	1	0	1	2	4	6	10
4	9	10	10	9	6	9	7	6	6	0	0	2	6	8	9
5	8	7	10	8	8	8	7	5	3	2	0	0	2	5	9
6	10	10	10	9	9	6	6	7	3	1	0	0	1	3	6
7	9	9	7	6	7	7	8	5	6	0	0	0	1	1	7
8	9	10	8	9	9	7	10	7	5	0	0	0	0	2	8
9	8	9	8	10	9	9	10	6	6	0	1	1	1	2	9
10	9	10	9	6	7	5	5	7	6	0	0	0	1	9	8
Orange oil
1	9	9	8	10	10	8	9	6	2	0	0	2	4	7	10
2	7	9	8	8	9	7	8	7	3	1	0	1	2	5	7
3	10	10	10	8	10	8	7	6	3	1	0	2	5	9	9
4	9	10	9	7	7	8	7	5	1	0	1	1	1	8	10
5	10	10	8	7	9	8	8	6	4	3	0	0	1	7	9
6	7	8	6	7	8	9	10	7	6	0	0	1	2	6	7
7	10	10	8	6	6	8	8	8	10	0	0	0	2	2	8
8	10	9	10	8	9	6	9	7	4	0	0	1	1	7	7
9	6	8	9	8	8	10	7	5	6	0	0	0	0	6	8
10	9	10	7	7	7	8	8	6	6	0	1	0	0	8	8
Mixture
1	10	9	10	9	8	10	8	6	3	3	0	0	0	7	8
2	9	9	10	8	9	9	7	7	4	2	0	2	6	7	7
3	8	10	9	10	9	10	9	5	0	0	0	0	3	5	8
4	8	8	8	10	9	8	10	7	6	0	0	0	1	4	7
5	8	7	10	10	10	10	7	8	4	2	0	2	0	6	4
6	10	10	8	9	9	6	8	8	5	2	0	1	1	7	8
7	10	10	10	5	6	8	6	9	6	1	0	0	1	5	8
8	10	10	10	8	9	5	10	5	8	1	0	0	0	2	6
9	8	9	9	9	9	6	8	8	1	1	0	0	1	4	6
10	8	8	9	6	7	7	6	7	3	1	0	0	0	9	7
Control
1	10	10	8	9	9	8	6	7	1	1	0	0	5	8	10
2	8	8	9	9	9	9	7	5	0	0	0	0	5	7	9
3	8	10	9	8	9	7	6	8	1	0	0	0	4	4	9
4	10	10	9	9	9	9	7	6	1	0	0	0	1	4	6
5	8	10	10	10	7	7	7	2	0	0	0	0	2	4	5
6	9	10	8	8	9	5	9	4	6	0	0	0	3	7	7
7	10	9	10	8	8	6	5	5	2	0	0	1	0	7	8
8	9	10	9	9	9	5	7	6	6	0	1	0	0	8	9
9	8	9	8	8	9	8	8	8	3	0	0	0	0	9	8
10	9	10	8	10	10	5	7	4	1	0	0	0	2	10	9

## Sheet: Calling PS 9 day
Experiment:
Age:	9 days old
Date:
strain:	TSL VIENNA 8
food:	PS
Replicates							T I M E
	07:00:00	08:00:00	09:00:00	10:00:00	11:00:00	12:00:00	13:00:00	14:00:00	15:00:00	16:00:00	17:00:00	18:00:00	19:00:00	20:00:00	20:45:00
Limonene
1	10	9	9	7	8	7	9	5	2	1	0	0	5	7	9
2	10	10	9	9	9	7	8	8	2	0	0	1	2	2	7
3	9	9	10	9	9	9	8	5	3	1	0	0	1	5	8
4	10	10	9	10	10	8	9	5	0	0	0	2	2	5	8
5	10	9	8	9	7	7	6	6	0	0	0	0	3	6	9
6	9	9	9	9	7	9	10	8	5	1	1	0	1	5	6
7	10	9	9	10	9	9	8	8	6	2	0	0	1	5	8
8	10	10	10	6	8	10	10	6	5	0	1	0	0	9	8
9	10	10	10	10	8	8	8	7	3	0	0	0	1	6	6
10	10	10	10	10	9	7	8	10	7	2	0	0	1	4	7
Orange oil
1	8	9	8	9	9	9	7	5	3	2	0	0	5	6	8
2	8	10	7	10	9	10	9	7	2	2	0	2	5	3	7
3	10	10	8	9	10	9	10	6	2	0	0	0	2	5	7
4	9	7	8	8	7	7	9	2	1	0	0	2	4	4	7
5	10	9	8	10	9	8	8	6	1	1	0	1	2	6	7
6	10	8	9	10	10	5	9	7	6	2	0	0	2	9	5
7	10	8	7	10	8	7	10	10	6	4	0	0	1	6	6
8	10	10	8	9	10	8	9	8	2	1	0	0	0	9	8
9	10	10	7	7	7	9	8	9	5	1	0	0	0	4	6
10	10	8	7	7	6	6	8	7	3	3	0	0	0	8	8
Mixture
1	9	10	10	10	10	9	8	5	4	1	0	1	3	6	8
2	9	10	8	10	8	9	8	8	5	1	0	3	4	3	7
3	10	9	10	9	10	9	9	6	3	0	0	2	2	8	9
4	9	9	8	9	9	7	8	7	3	0	0	1	4	7	7
5	8	10	9	9	8	9	9	6	3	2	0	2	6	6	6
6	10	9	7	9	9	8	7	7	6	1	0	0	1	2	10
7	8	8	10	10	6	7	8	7	3	0	0	0	1	5	8
8	7	10	10	8	8	10	5	10	6	2	0	0	0	4	7
9	7	8	8	8	8	9	6	8	0	3	0	0	1	6	5
10	10	7	9	8	6	9	10	7	4	2	0	0	0	4	10
Control
1	10	9	7	8	10	8	9	4	0	0	0	1	1	9	9
2	7	9	8	8	9	7	4	3	0	0	1	3	4	9	9
3	10	10	10	9	8	8	5	2	0	0	0	0	0	7	8
4	8	10	7	9	9	9	8	4	1	1	0	0	0	7	8
5	6	7	10	9	8	6	8	5	3	1	2	2	1	9	9
6	9	9	9	8	8	8	7	9	3	0	0	0	3	4	7
7	8	8	8	8	9	8	7	6	5	0	0	0	0	5	7
8	8	10	9	9	9	10	9	8	5	0	0	0	0	1	8
9	10	8	9	7	9	9	8	6	5	0	0	0	0	4	8
10	10	8	8	4	7	8	6	4	5	0	0	0	2	7	10

[truncated: 3 more sheets: Calling PS 8 day, Calling PS 7 day, Calling PS 6 day]
